# Supplementary material for: Synthesis, Structural Characterization, Hirschfeld Surface Analysis and Photocatalytic CO2 Reduction Activity of a New Dinuclear Gd(III) Complex with 6-Phenylpyridine-2-Carboxylic Acid and 1,10-Phenanthroline Ligands
Source: MDPI journal article supplement (doi:10.3390/molecules28227595), 2023-11-14
Supplement: s1 [file s1]

# Synthesis, Structural Characterization, Hirschfeld Surface Analysis and Photocatalytic CO<sub>2</sub> Reduction Activity of a New Dinuclear Gd(III) Complex with 6-Phenylpyridine-2-carboxylic acid and 1,10-Phenanthroline Ligands

Li-Hua Wang<sup>1</sup> and Xi-Shi Tai<sup>2,\*</sup>

<sup>1</sup> College of Biology and Oceanography, Weifang University, Weifang 261061, P. R. China

<sup>2</sup> College of Chemistry and Chemical Engineering, Weifang University, Weifang 261061, P. R. China

The synthetic route for complex (1) is shown in Schemes S1.

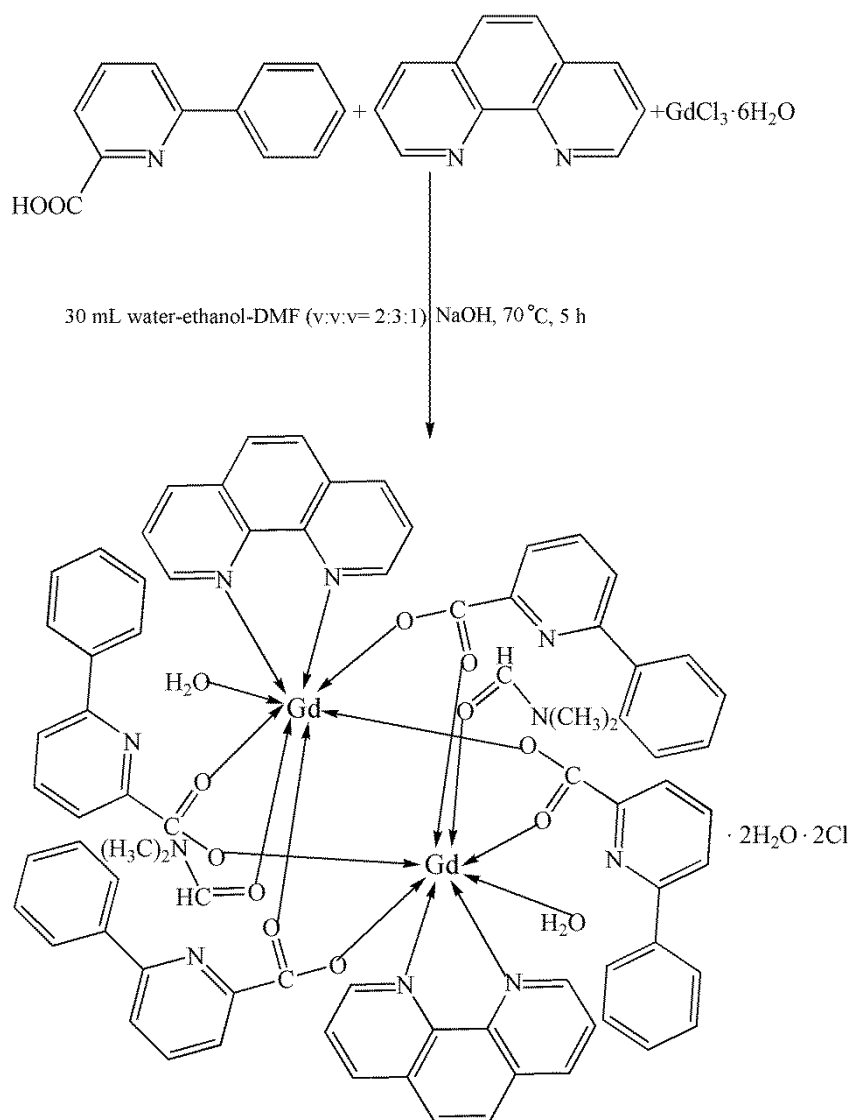

**Scheme S1.** Synthetic route for complex (1).

The method of the yield calculation is following:

1. mL of the gas has been got out every hour and tested via a gas chromatograph. The peak area of the product was obtained. Subsequently, we quantified the number of moles

of per peak area via using the CO and CH<sub>4</sub> standard gases, which is noted as Y<sub>1CO</sub> and Y<sub>1CH<sub>4</sub></sub>, respectively. The total amount of CO and CH<sub>4</sub> is calculated according to the equation below.

$$Y_{CO} = \frac{Y_{1CO} \times S_{CO} \times Sr}{m} \text{ and } Y_{CH_4} = \frac{Y_{1CH_4} \times S_{CH_4} \times Sr}{m}$$

S<sub>CO</sub> and S<sub>CH<sub>4</sub></sub> is the peak areas of CO and CH<sub>4</sub>, which was measured using the gas chromatograph. Sr is the reactor volume.

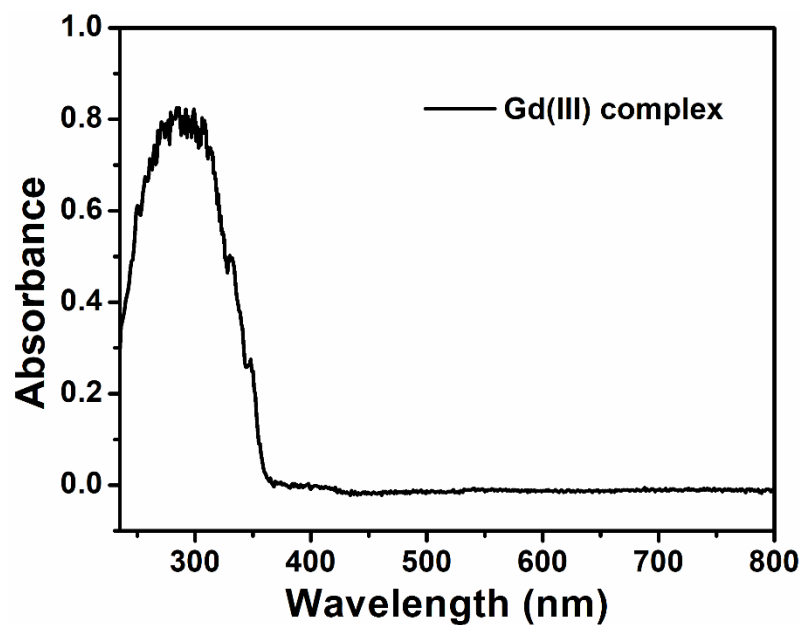

Figure S1. UV-vis absorption spectrum of complex (1).
